# Supplementary material for: Is Grazing Good for Wet Meadows? Vegetation Changes Caused by White-Backed Cattle
Source: MDPI journal article supplement (doi:10.3390/agriculture13020261), 2023-01-20
Supplement: s1 [file s1]

Supplementary Materials

# Is Grazing Good for Wet Meadows? Vegetation Changes Caused by White-Backed Cattle

**Table S1.** Factor loadings of PCA based on analysis according to species cover.

| Species                               | Principal component |        |       |        |        |        |
|---------------------------------------|---------------------|--------|-------|--------|--------|--------|
|                                       | PCA1                | PCA2   | PCA3  | PCA4   | PCA5   | PCA 6  |
| <i>Ch All. Magnocaricion</i>          | 0.032               | 0.224  | 0.275 | 0.463  | 0.806  | −0.100 |
| <i>Ch All. Phragmition</i>            | 0.016               | 0.086  | 0.020 | 0.054  | −0.184 | −0.977 |
| <i>Ch All. Calthion palustris</i>     | −0.621              | −0.717 | 0.207 | 0.229  | 0.014  | −0.059 |
| <i>Ch O. Molinietalia</i>             | 0.196               | 0.014  | 0.931 | −0.242 | −0.184 | 0.045  |
| <i>Ch Cl. Molinio-Arrhenatheretea</i> | −0.650              | 0.647  | 0.116 | 0.207  | −0.298 | 0.116  |
| Other species                         | 0.389               | −0.093 | 0.033 | 0.793  | −0.440 | 0.125  |

**Table S2.** Summary statistics (mean and standard deviation) of plant species cover by year.

| Characteristic                        | Year                       |                             |                             |                            | Test values             |
|---------------------------------------|----------------------------|-----------------------------|-----------------------------|----------------------------|-------------------------|
|                                       | 2016                       | 2017                        | 2018                        | 2019                       |                         |
| <i>Ch All. Magnocaricion</i>          | <sup>c</sup> 60.5 ± 36.64  | <sup>bc</sup> 56.08 ± 38.26 | <sup>ab</sup> 47.01 ± 32.09 | <sup>a</sup> 41.74 ± 30.67 | F=7.82; df=3; p<0.001   |
| <i>Ch All. Phragmition</i>            | <sup>b</sup> 13.27 ± 24.92 | <sup>ab</sup> 11.35 ± 20.93 | <sup>a</sup> 7.38 ± 17.45   | <sup>a</sup> 7.38 ± 17.45  | F=5.07; df = 3; p=0.005 |
| <i>Ch All. Calthion palustris</i>     | 11.29 ± 17.81              | 12.35 ± 15.7                | 13.79 ± 13.07               | 14.45 ± 12.63              | F=0.79; df=3; p=0.505   |
| <i>Ch O. Molinietalia</i>             | 13.58 ± 11.96              | 11.18 ± 7.5                 | 17.43 ± 10.73               | 15.9 ± 10.15               | F=2.44; df=3; p=0.080   |
| <i>Ch Cl. Molinio-Arrhenatheretea</i> | <sup>a</sup> 9.41 ± 14.28  | <sup>a</sup> 9.62 ± 11.84   | <sup>ab</sup> 15.14 ± 12.16 | <sup>b</sup> 17.52 ± 14.64 | F=5.90; df=3; p=0.002   |
| Other species                         | <sup>a</sup> 0.95 ± 1.33   | <sup>a</sup> 1.08 ± 1.28    | <sup>a</sup> 1.72 ± 1.5     | <sup>b</sup> 4.52 ± 4.8    | F=6.31; df=3; p=0.002   |

**Table S3.** Summary statistics (mean and standard deviation) of phytosociological relevés characteristics by year.

| Characteristic   | Year                       |                             |                             |                             | Test values                   |
|------------------|----------------------------|-----------------------------|-----------------------------|-----------------------------|-------------------------------|
|                  | 2016                       | 2017                        | 2018                        | 2019                        |                               |
| L                | 7.225 ± 0.417              | 7.218 ± 0.408               | 7.178 ± 0.329               | 7.156 ± 0.317               | F=0.92; df=3;<br>p=0.441      |
| T                | <sup>a</sup> 5.183 ± 0.133 | <sup>ab</sup> 5.194 ± 0.131 | <sup>ab</sup> 5.207 ± 0.122 | <sup>b</sup> 5.225 ± 0.126  | F=3.86; df=3;<br>p=0.017      |
| K                | 4.055 ± 1.373              | 4.073 ± 1.371               | 4.171 ± 1.212               | 4.283 ± 1.220               | F=2.68; df=3;<br>p=0.061      |
| F                | <sup>b</sup> 9.035 ± 0.538 | <sup>b</sup> 8.972 ± 0.587  | <sup>a</sup> 8.707 ± 0.561  | <sup>a</sup> 8.567 ± 0.551  | F=17.85; df=3;<br>p<0.001     |
| R                | <sup>a</sup> 5.329 ± 1.488 | <sup>ab</sup> 5.375 ± 1.444 | <sup>b</sup> 5.727 ± 1.046  | <sup>ab</sup> 5.647 ± 0.928 | F=3.70; df=3;<br>p=0.020      |
| N                | 4.776 ± 0.728              | 4.784 ± 0.702               | 4.655 ± 0.510               | 4.614 ± 0.476               | F=2.60; df=3;<br>p=0.067      |
| EGQ              | <sup>a</sup> 12.05 ± 8.271 | <sup>a</sup> 12.01 ± 8.262  | <sup>a</sup> 15.12 ± 9.303  | <sup>b</sup> 20.38 ± 8.289  | F=9.08; df=3;<br>p<0.001      |
| Species no.      | <sup>a</sup> 15.38 ± 5.881 | <sup>ab</sup> 17.38 ± 4.426 | <sup>bc</sup> 20.30 ± 4.59  | <sup>c</sup> 24.07 ± 6.664  | GLM F=30.45;<br>df=3; p<0.001 |
| Shannon-Wiener H | <sup>a</sup> 1.367 ± 0.585 | <sup>a</sup> 1.412 ± 0.602  | <sup>b</sup> 1.776 ± 0.544  | <sup>b</sup> 1.949 ± 0.594  | F=32.38; df=3;<br>p<0.001     |

abc – means in a row marked with the different letters differ significantly (ANOVA with repeated measures).

**Table S4.** Factor loadings of PCA based on analysis according to Ellenberg ecological indices.

| Ellenberg<br>Index | Principal component |        |       |        |        |        |
|--------------------|---------------------|--------|-------|--------|--------|--------|
|                    | PCA1                | PCA2   | PCA3  | PCA4   | PCA5   | PCA 6  |
| L                  | 0.032               | 0.224  | 0.275 | 0.463  | 0.806  | −0.100 |
| T                  | 0.016               | 0.086  | 0.020 | 0.054  | −0.184 | −0.977 |
| K                  | −0.621              | −0.717 | 0.207 | 0.229  | 0.014  | −0.059 |
| F                  | 0.196               | 0.014  | 0.931 | −0.242 | −0.184 | 0.045  |
| R                  | −0.650              | 0.647  | 0.116 | 0.207  | −0.298 | 0.116  |
| N                  | 0.389               | −0.093 | 0.033 | 0.793  | −0.440 | 0.125  |
